# Supplementary material
Source: PubMed Central journal article supplement (PMC5006287)
Supplement: supp_btv633_siska_discordant_supplementary.pdf [file supp_btv633_siska_discordant_supplementary.pdf]

## Supplementary Methods

### Discordant

#### Initial Parameters

The parameters used to separate the class components are denoted by  $b$  in Figure 1. Group  $v=1,2$  has a unique parameter  $b_v$  to allow for different mixture model variances for each group. The parameter  $b_v$  is the standard deviation of the Fisher transformed z scores. Observations between  $-b_v$  and  $b_v$  are set to component 0, observations to the left of  $-b_v$  are set to component  $-$  and observations to the right of  $b_v$  are set to component  $+$ . Based on these assignments, the mean and variance of the observations in each component were used to determine the initial parameters  $\mu_0, \mu_1, \mu_2, \sigma_0, \sigma_1, \sigma_2$  for group 1,  $\eta_1, \eta_2, \tau_0, \tau_1, \tau_2$  for group 2. The EM algorithm (Dempster et al., 1977) is then used to iteratively update parameters in the M-step and the posterior probability for each class and group in the E-step (Figure 1).

Adjustments were made from the original Lai, et. al algorithm. In Lai et al., z scores derived from differential expression in microarray experiments have a  $N(0,1)$  distribution, whereas the Fisher-transformed z scores of correlation coefficients tend to have a smaller standard deviation. It was determined using a grid approach that having  $b$  set to the standard deviation of the z scores improved convergence of the EM algorithm and resulted in a model with a better fit than when  $b$  was set to 1.

#### Estimation of Parameters in M-step

Each parameter contained in  $\theta$  and weights  $\pi$  are estimated in a similar way. The symbols  $i$  and  $j$  are classes  $-$ , 0 and  $+$  for groups 1 and 2 respectively.

For parameters in group 1:

$$\begin{aligned}\pi_i &= \frac{\sum_{k=1}^K \sum_{j=0}^2 q_{ij}^r(k)}{K} \\ \mu_i^r &= \frac{\sum_{k=1}^K \sum_{j=0}^2 q_{ij}^r(k) \cdot z^{(1)}(k)}{\sum_{k=1}^K \sum_{j=0}^2 q_{ij}^r(k)} \\ \sigma_i^r &= \frac{\sum_{k=1}^K \sum_{j=0}^2 q_{ij}^r(k) \cdot (z^{(1)} - \mu_i^r)^2}{\sum_{k=1}^K \sum_{j=0}^2 q_{ij}^r(k)}\end{aligned}$$

For parameters in group 2:

$$\begin{aligned}\pi_j &= \frac{\sum_{k=1}^K \sum_{i=0}^2 q_{ij}^r(k)}{K} \\ \eta_j^r &= \frac{\sum_{k=1}^K \sum_{i=0}^2 q_{ij}^r(k) \cdot z^{(2)}(k)}{\sum_{k=1}^K \sum_{i=0}^2 q_{ij}^r(k)} \\ \tau_j^r &= \frac{\sum_{k=1}^K \sum_{i=0}^2 q_{ij}^r(k) \cdot (z^{(2)} - \eta_j^r)^2}{\sum_{k=1}^K \sum_{i=0}^2 q_{ij}^r(k)}\end{aligned}$$

## EBcoexpress

#### Initial Parameters

Initial hyperparameters in EBcoexpress can either be determined by using the normal mixture modeling function `mclust()` by default in the EBcoexpress R package (Dawson et al., 2012), or by a grid approach. We did the latter for the simulations since the hyperparameters determined by `mclust` produced posterior probabilities that had small range and were noninformative. The hyperparameters we determined by the grid approach were based on three components and produced a more even distribution of posterior probabilities. Since EBcoexpress takes long periods to run with large datasets, only ten percent of the data was randomly selected for ten iterations when determining appropriate hyperparameters. The final output of EBcoexpress is either the posterior probability of differential coexpression or equivalent coexpression

### **Hardware**

Biological data was run on a server with 11 Intel(R) Xeon(R) CPU E5-2640 0 2.50GHz processors, 90 GB of memory and hard disk drive able to hold 41 GB. Simulations were run on a MacBook Pro with a 2.7 GHz Intel Core i7 and 8 GB of memory. Run-time reported for biological data is measured on the larger server.

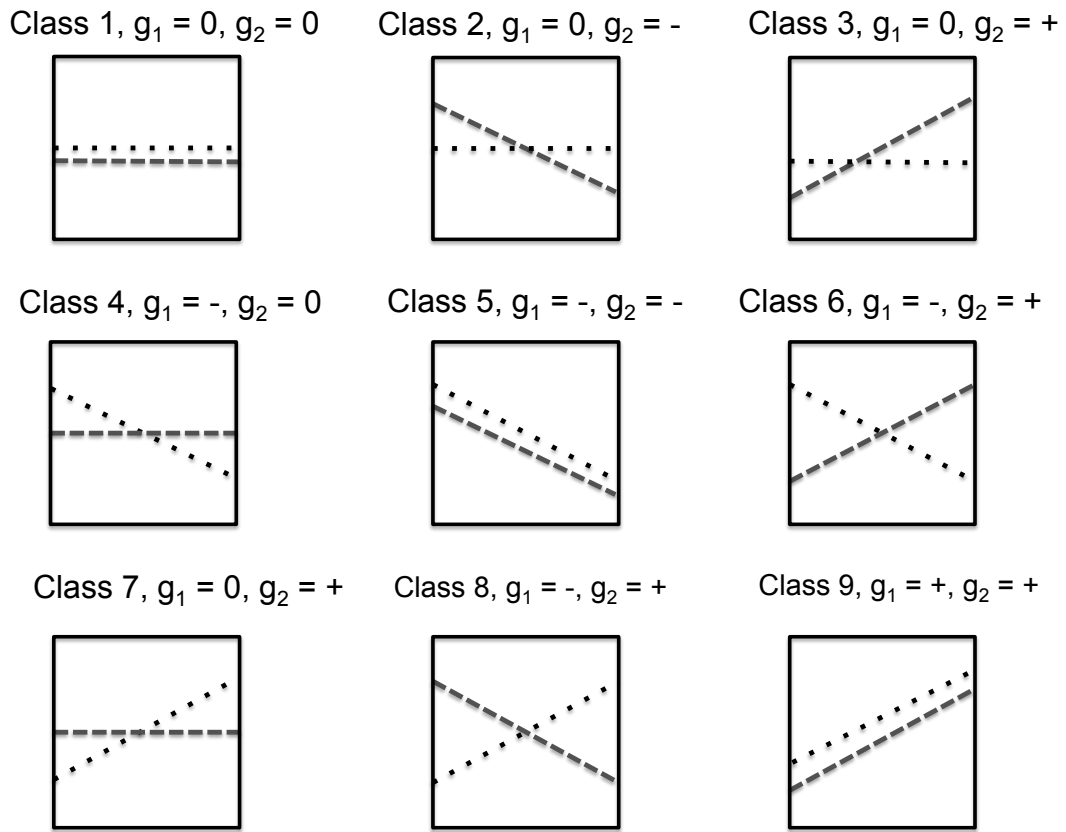

Supplementary Figure 1. Visualization of classes from class matrix in figure 1b. Group 1 dashes, group 2 dots.

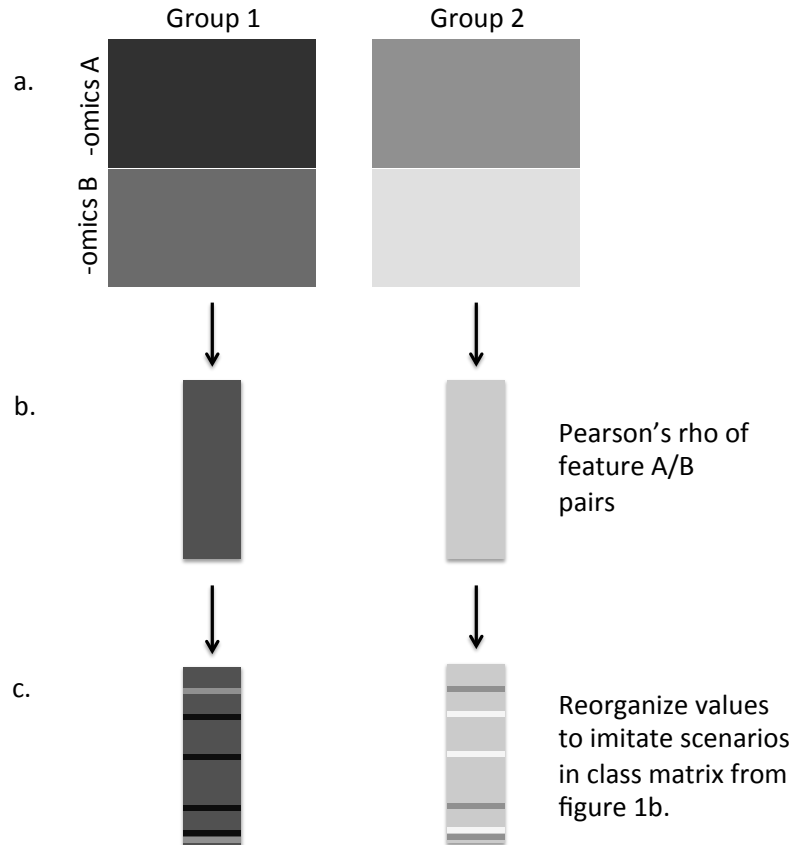

Supplementary Figure 2. Pipeline of simulations. Simulations were set up in order to easily control the number of feature pairs that were DC, the total number of feature pairs and sample size. Also, we wished to examine the effect the data had when using two different type of -omics.

a. Two matrices are formed for each group, where the two matrices associate with A or B omics, for a total of 4 matrices shaded in the figure. Each of the four matrices are simulated using `mvrnorm` in the R package `MASS` where the mean was 0 and covariance matrix is a diagonal matrix. This results in independent samples/subjects and independent omics features.

b. Correlation coefficients are determined between the  $m$ th feature in omics A and the  $n$ th feature in omics B, so there are  $M \times N$  feature pairs, where  $M$  is the number of omics A features and  $N$  is the number of omics B features. As in the real data, this creates dependencies among some of the feature pairs since a feature occurs in more than one pair.

c. The number of DC pairs is determined by sectioning out the most significant correlation coefficients. These are swapped to imitate the scenarios in the class matrix from figure 1b, e.g. a positive correlation coefficient is paired with 0 in order to imitate class 3 or 6.

| Sample Size | Forced DC Pairs | Feature Size | Correlation Method      |
|-------------|-----------------|--------------|-------------------------|
| 10 10       | 0.1             | 500          | Spearman                |
| 20 20       | 0.2             | 1000         | Pearson                 |
| 50 50       | 0.3             | 1500         | Biweight MidCorrelation |
|             |                 |              |                         |
|             |                 |              |                         |

Supplementary Table 1. Summary of Simulation Alteration. Highlight red is the standard all alterations were based on and reported in Figure 4 and 5. ROC, sensitivity and specificity curves for other parameters found in Supplementary Figures 4 and 5.

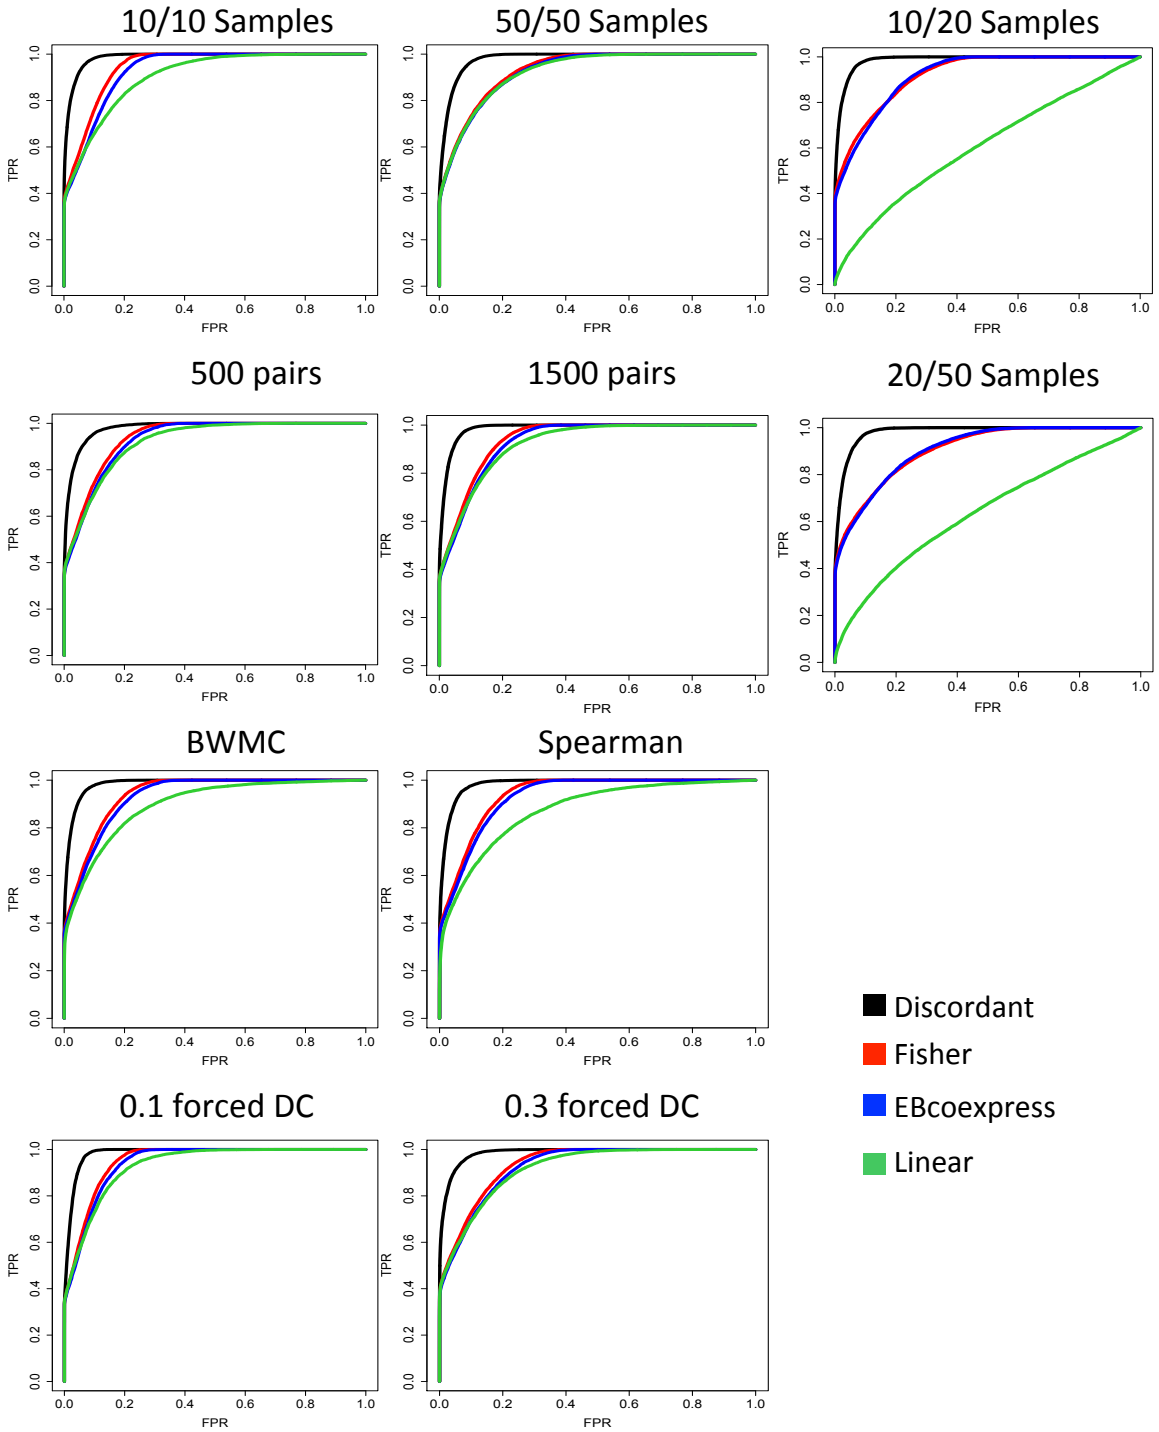

Supplementary Figure 3. ROC curves with changes in simulation parameters. Title tells parameter changed from shaded red row in Supplementary Table 1.

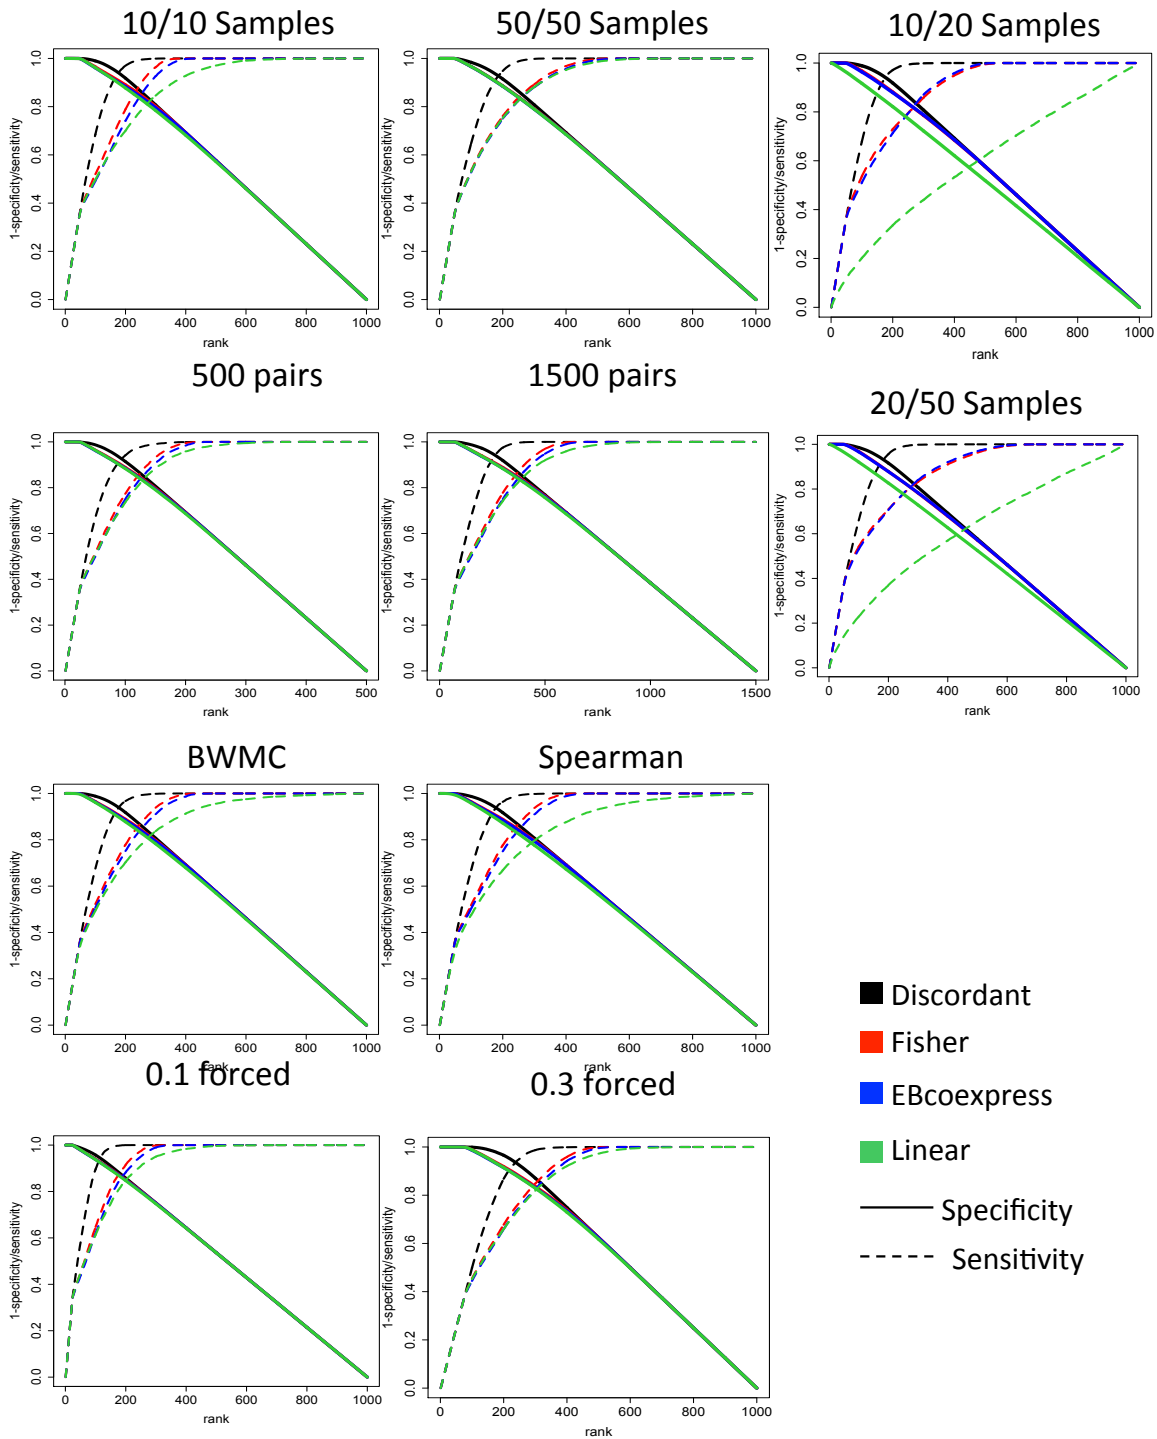

Supplementary Figure 4. Sensitivity/1-Specificity curves with changes in simulation parameters. Title tells parameter changed from shaded red row in Supplementary Table 1.

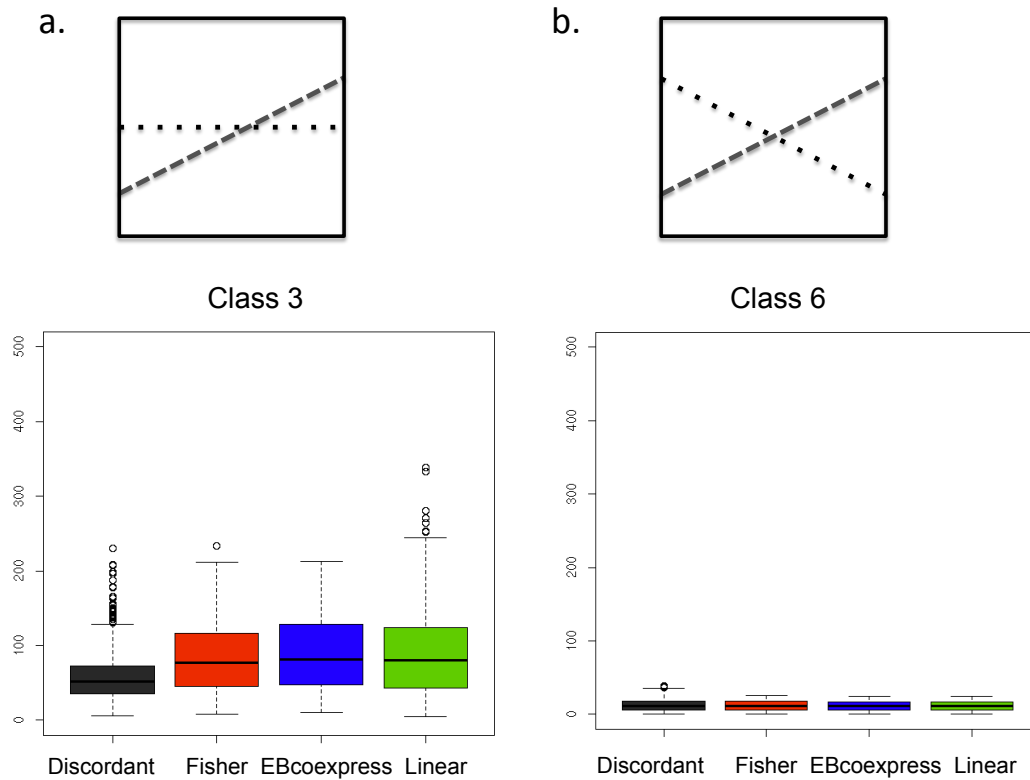

Supplementary Figure 5. Distribution of class rank for all methods. group 1 and 2 are dashed and dotted respectively. a. Class 3 is an example of disrupted DC where group 1 has positive correlation, and group 2 has no correlation. Discordant has a smaller distribution of rank for class 3 compared to other method. b. Class 6 is an example of cross DC where group 1 has positive correlation and group 2 has negative correlation. All four methods have similar distribution of rank for class 6.



| Method                          | statistic   | hsa-miR-124a | hsa-miR-137 | hsa-miR-326 | hsa-miR-92b |
|---------------------------------|-------------|--------------|-------------|-------------|-------------|
| <b>Discordant</b>               | Rank        | 223          | 1081        | 472         | 83          |
|                                 | 1 - pp      | 2.51e-7      | 1.16e-6     | 5.04e-7     | 1.05e-7     |
|                                 | 1 - q-value | 4.98e-7      | 2.39e-6     | 1.02e-6     | 2.02e-7     |
| <b>EBcoexpress</b>              | Rank        | 585          | 1862        | 628         | 185         |
|                                 | 1 - pp      | 3.54e-3      | 9.86e-3     | 3.84e-3     | 1.25e-3     |
|                                 | 1 - q-value | 6.66e-3      | 0.184       | 7.23e-3     | 2.44e-3     |
| <b>Fisher</b>                   | Rank        | 799          | 1282        | 803         | 238         |
|                                 | p-value     | 3.61e-6      | 7.43e-6     | 3.63e-6     | 6.24e-7     |
|                                 | FDR         | 0.109        | 0.139       | 0.109       | 0.629       |
| <b>miRNA –Dep. Linear</b>       | Rank        | 3246         | 297         | 768         | 69          |
|                                 | p-value     | 5.65e-5      | 1.29e-6     | 6.34e-6     | 8.95e-8     |
|                                 | FDR         | 0.420        | 0.103       | 0.198       | 0.031       |
| <b>Transcript – Dep. Linear</b> | Rank        | 467          | 8807        | 4           | 1108        |
|                                 | p-value     | 1.85e-5      | 4.72e-4     | 1.97e-7     | 4.78e-5     |
|                                 | FDR         | 0.950        | 1           | 0.578       | 1           |

Supplementary Table 2. Summary of unique GBM-related miRNAs top ranked pair with a transcript. Shown is rank, p-value/1 - posterior probability (1 - pp) and FDR/q-value for Discordant, EBcoexpress and Fisher.

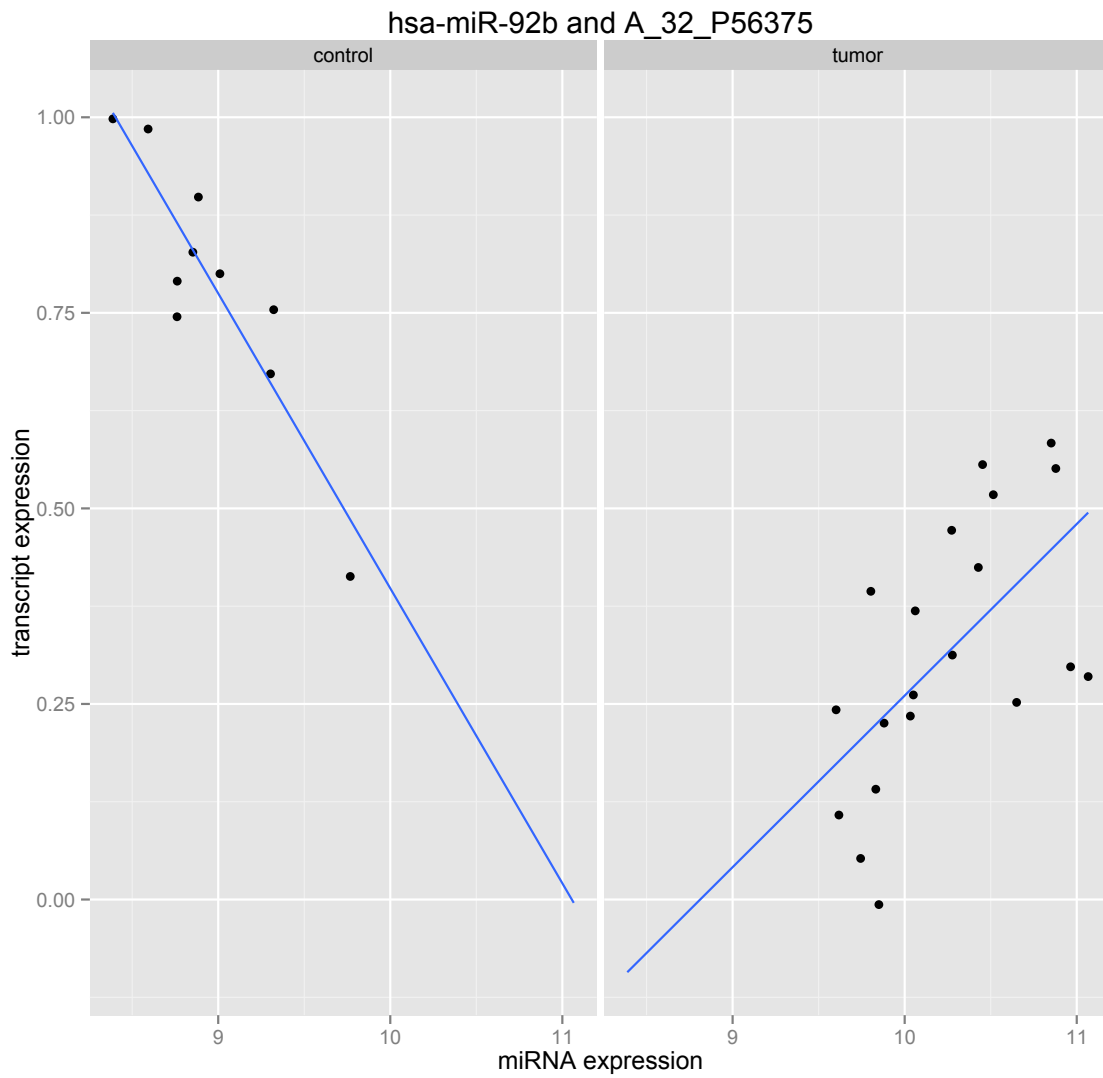

Supplementary Figure 7. Top example of unique GBM-related miRNA differential correlation in GBM data in Discordant (probe was not annotated, probe name in title).

| <b>Gene</b>  | <b>Connections</b> | <b>Annotations</b>                                                                    |
|--------------|--------------------|---------------------------------------------------------------------------------------|
| <b>AGAP2</b> | 60                 | Anti-apoptotic effects of nerve growth factor                                         |
| <b>CRY2</b>  | 39                 | Circadian protein                                                                     |
| <b>GRIN1</b> | 34                 | Glutamate receptor, form ligand-gated ion channel                                     |
| <b>UPF3A</b> | 34                 | Part of post-splicing multiprotein complex involved in mRNA decay and nuclear export. |

Suppl. Table 3. Summary of gene hubs with top connections in pairs with q-value  $1.0e-4$  in GBM analysis.

|                                                                             | Discordant |         |             | EBcoexpress |       |             | Fisher  |         |     |
|-----------------------------------------------------------------------------|------------|---------|-------------|-------------|-------|-------------|---------|---------|-----|
| metabolite                                                                  | Rank       | pp      | 1 - q-value | Rank        | pp    | 1 - q-value | Rank    | p-value | FDR |
| *1-3Galalpha1-3Galalpha1-3Galalpha1-4Galbeta1-4Glcbeta-Cer(d18:1/24:1(15Z)) | 272483     | 6.87e-3 | 1.31e-2     | 312901      | 0.385 | 0.496       | 998686  | 0.216   | 1   |
| 3-O-Sulfogalactosylceramide (d18:1/18:1(9Z))                                | 105638     | 2.91e-3 | 5.54e-3     | 89993       | 0.253 | 0.345       | 99173   | 0.096   | 1   |
| C18-OH Sulfatide                                                            | 854304     | 1.96e-2 | 3.79e-2     | 554288      | 0.452 | 0.566       | 523347  | 0.173   | 1   |
| Cer(d18:1/22:1(13Z))                                                        | 158937     | 4.21e-3 | 8.02e-3     | 165520      | 0.314 | 0.417       | 91285   | 0.093   | 1   |
| Cer(d18:1/23:0)                                                             | 626399     | 1.47e-2 | 2.83e-2     | 372631      | 0.406 | 0.517       | 384322  | 0.155   | 1   |
| Cer(d18:1/24:1(15Z))                                                        | 70023      | 2.02e-3 | 3.82e-3     | 66774       | 0.226 | 0.311       | 53879   | 0.077   | 1   |
| Cer(d18:2/23:0)                                                             | 198078     | 5.14e-3 | 9.80e-3     | 372969      | 0.406 | 0.517       | 102053  | 0.097   | 1   |
| Ceramide (d18:1/18:0)                                                       | 161785     | 4.27e-3 | 8.14e-3     | 321358      | 0.388 | 0.499       | 70169   | 0.085   | 1   |
| Ceramide (d18:1/22:0)                                                       | 15721      | 5.49e-4 | 1.02e-3     | 15698       | 0.123 | 0.178       | 16451   | 0.050   | 1   |
| Ceramide (d18:1/25:0)                                                       | 134584     | 3.62e-3 | 6.90e-3     | 137213      | 0.295 | 0.394       | 78423   | 0.088   | 1   |
| CerP(d18:1/24:1(15Z))                                                       | 169281     | 4.45e-3 | 8.49e-3     | 255398      | 0.362 | 0.470       | 796240  | 0.200   | 1   |
| Ganglioside GA1 (d18:1/16:0)                                                | 409392     | 9.96e-3 | 1.91e-2     | 441601      | 0.426 | 0.538       | 944945  | 0.212   | 1   |
| Ganglioside GM1 (18:1/9Z-18:1)                                              | 168094     | 4.42e-3 | 8.44e-3     | 290467      | 0.377 | 0.486       | 457741  | 0.165   | 1   |
| Ganglioside GM3 (d18:1/14:0)                                                | 663578     | 1.55e-2 | 2.99e-2     | 733865      | 0.486 | 0.599       | 423699  | 0.161   | 1   |
| Ganglioside GM3 (d18:1/16:0)                                                | 1160391    | 2.60e-2 | 5.07e-2     | 633445      | 0.468 | 0.581       | 733809  | 0.195   | 1   |
| GlcAbeta-Cer(d18:1/18:0)                                                    | 927875     | 2.11e-2 | 4.10e-2     | 566984      | 0.455 | 0.568       | 1098109 | 0.224   | 1   |
| Glucosylceramide (d18:1/25:0)                                               | 731165     | 1.69e-2 | 3.27e-2     | 527497      | 0.447 | 0.560       | 676768  | 0.189   | 1   |
| Lactosylceramide (d18:1/18:1(9Z))                                           | 147435     | 3.93e-3 | 7.49e-3     | 217794      | 0.344 | 0.451       | 262888  | 0.136   | 1   |
| N-(tetradecanoyl)-sphing-4-enine-1-(2-aminoethylphosphonate)                | 376192     | 9.22e-3 | 1.77e-2     | 432036      | 0.423 | 0.535       | 226664  | 0.129   | 1   |
| NeuGalpha2-3Galbeta1-4GlcNAcbeta1-3Galbeta1-4Glcbeta-Cer(d18:1/24:1(15Z))   | 472751     | 1.13e-2 | 2.18e-2     | 545833      | 0.451 | 0.564       | 1043493 | 0.220   | 1   |
| N-Lignoceroylsphingosine                                                    | 1871161    | 4.09e-2 | 8.05e-2     | 1334581     | 0.556 | 0.665       | 1877890 | 0.269   | 1   |
| N-Palmitoylsphingosine                                                      | 520229     | 1.24e-2 | 2.38e-2     | 319315      | 0.388 | 0.498       | 441743  | 0.163   | 1   |
| SM(d16:1/17:0)                                                              | 130542     | 3.52e-3 | 6.71e-3     | 107532      | 0.270 | 0.365       | 298258  | 0.142   | 1   |
| SM(d18:0/24:1(15Z))                                                         | 1207572    | 2.70e-2 | 5.27e-2     | 1803152     | 0.590 | 0.695       | 1106829 | 0.224   | 1   |
| SM(d18:1/12:0)                                                              | 12906      | 4.64e-4 | 8.58e-4     | 14048       | 0.117 | 0.169       | 95758   | 0.095   | 1   |
| SM(d18:1/14:0)                                                              | 3146       | 1.45e-4 | 2.61e-4     | 3449        | 0.060 | 0.090       | 23730   | 0.057   | 1   |
| SM(d18:1/16:1)                                                              | 1855826    | 4.06e-2 | 7.99e-2     | 2791220     | 0.637 | 0.735       | 2001704 | 0.276   | 1   |
| SM(d18:1/20:1)                                                              | 2624635    | 5.68e-2 | 1.12e-1     | 2090254     | 0.606 | 0.709       | 1590396 | 0.254   | 1   |
| SM(d18:1/23:0)                                                              | 140351     | 3.76e-3 | 7.17e-3     | 222316      | 0.453 | 0.453       | 188406  | 0.121   | 1   |
| SM(d18:1/24:1(15Z))                                                         | 198733     | 5.15e-3 | 9.83e-3     | 146886      | 0.402 | 0.402       | 334705  | 0.148   | 1   |
| SM(d18:2/14:0)                                                              | 493438     | 1.18e-2 | 2.27e-2     | 473547      | 0.547 | 0.547       | 523556  | 0.173   | 1   |
| SM(d18:2/15:0)                                                              | 214413     | 5.52e-3 | 1.05e-2     | 403837      | 0.527 | 0.527       | 74789   | 0.087   | 1   |
| SM(d18:2/23:0)                                                              | 144149     | 3.85e-3 | 7.34e-3     | 206117      | 0.338 | 0.444       | 75113   | 0.087   | 1   |
| Sphingosine                                                                 | 187977     | 4.90e-3 | 9.34e-3     | 156783      | 0.308 | 0.410       | 451307  | 0.164   | 1   |
| Sphingosine 1-phosphate                                                     | 319191     | 7.94e-3 | 1.52e-2     | 394444      | 0.712 | 0.524       | 554183  | 0.176   | 1   |
| Sphingosine-1-phosphocholine                                                | 99476      | 2.76e-3 | 5.24e-3     | 109241      | 0.272 | 0.367       | 461599  | 0.166   | 1   |
| Trihexosylceramide (d18:1/16:0)                                             | 954799     | 2.17e-2 | 4.21e-2     | 536542      | 0.449 | 0.562       | 869371  | 0.206   | 1   |

Supplementary Table 4. Summary of sphingolipid metabolite top ranked pair with a sphingolipid-related gene. Shown is rank, p-value/1 - posterior probability (1 - pp) and FDR/q-value for Discordant, EBcoexpress and Fisher.

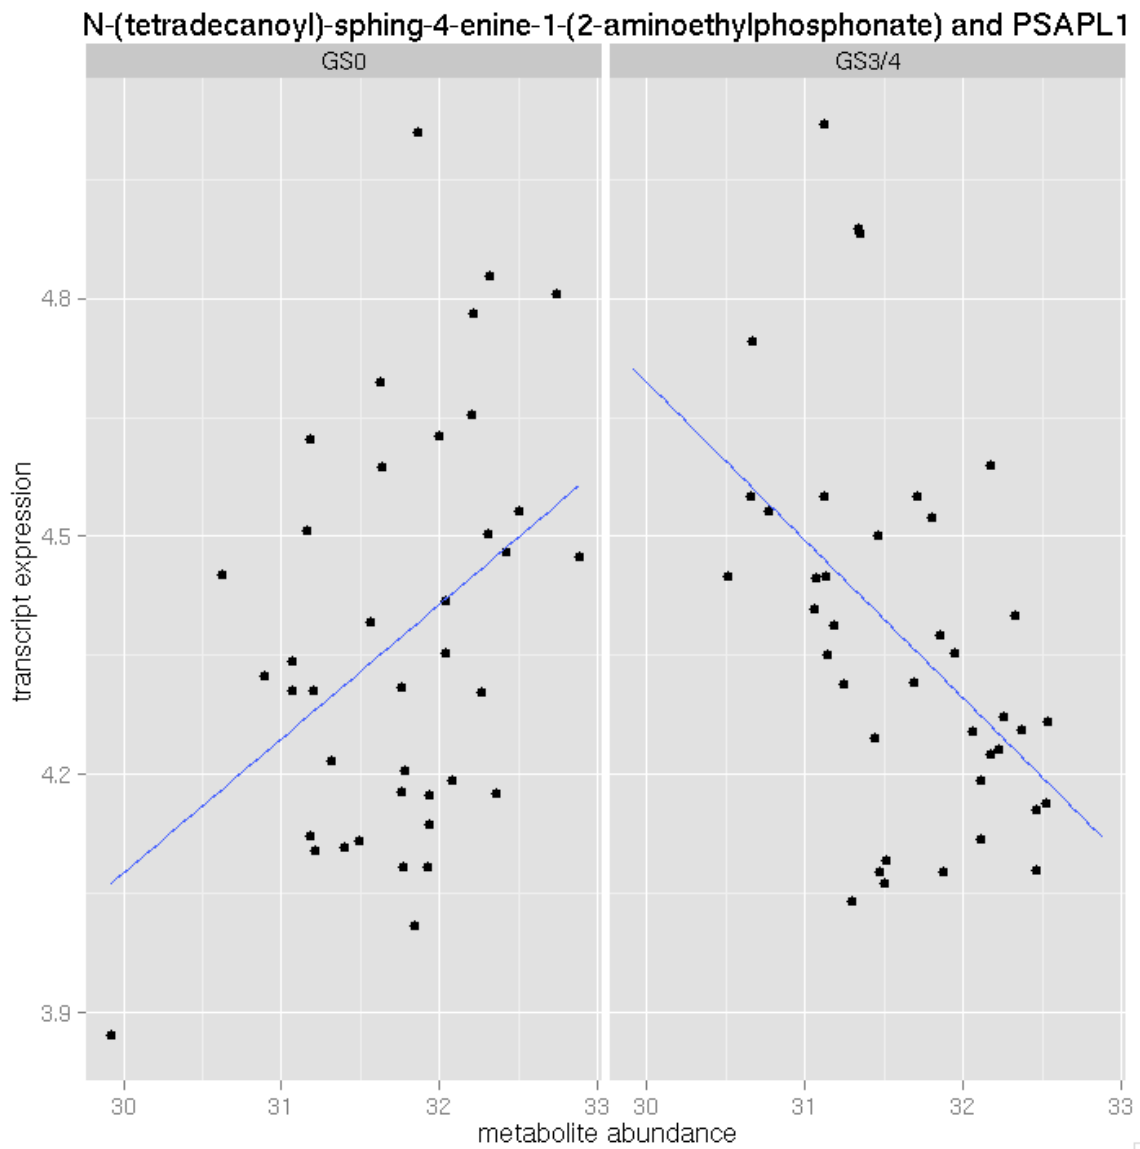

Supplementary Figure 8. Top example of sphingolipid-related differentially coexpressed pair in Discordant.

| Type       | Name            | Connections | Annotation              |
|------------|-----------------|-------------|-------------------------|
| Gene       | LOC284561       | 247         | unknown                 |
| Gene       | SARDH           | 265         | Sarcosine dehydrogenase |
| Gene       | IGHG1           | 294         | Immunoglobulin          |
| Metabolite | C20 H33 N9 P2 S | 2222        | Unknown                 |
| Metabolite | L-valine        | 1667        | Amino acid              |

Supplementary Table 5. Summary of metabolite gene hubs with pairs with q-value  $2.0e-3$  in COPD analysis.

| <b>Method</b> | <b>GBM</b>   | <b>COPD</b>   |
|---------------|--------------|---------------|
| Discord       | 19.26 hours  | 2.16 days     |
| EBcoexpress   | 10.42 days   | 39.53 days    |
| Fisher        | 6.35 seconds | 18.85 seconds |
| Linear        | 16.15 hours  | N/A           |

Supplementary Table 5. Run-time on 11 Intel(R) Xeon(R) CPU E5-2640 0 2.50GHz processors, 90 GB of memory.

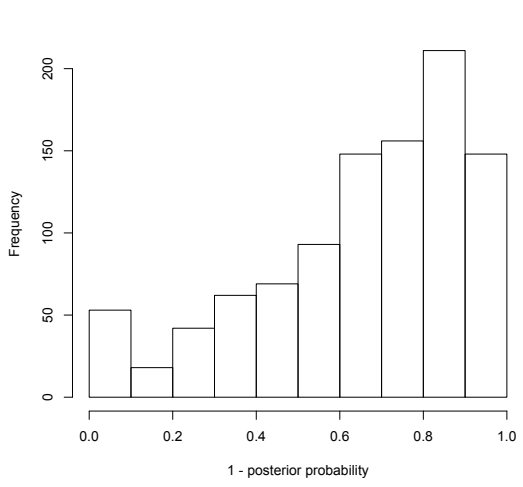

a.

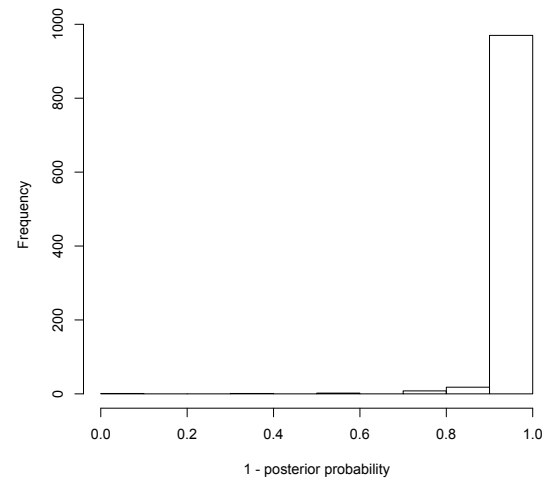

b.

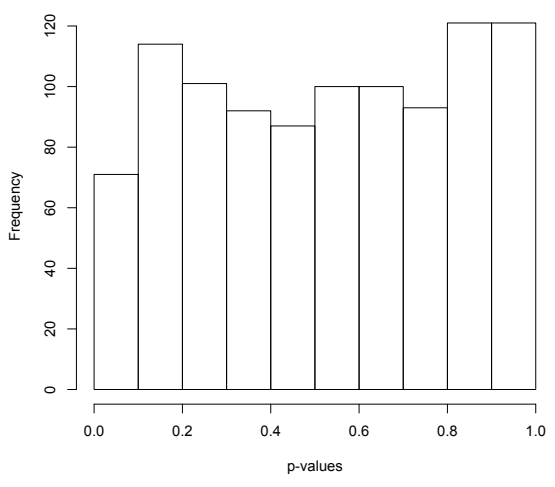

c.

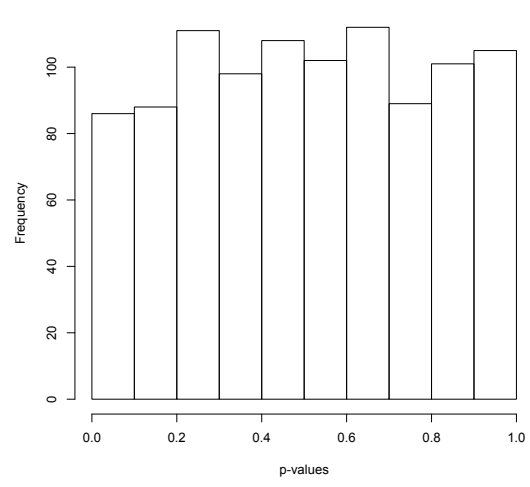

Supplementary Figure 9. Distributions of simulated p-values and posterior probabilities (1000 pairs, 0.2 DC, sample size 20 for both groups). a. Discordant. b. EBcoexpress c. Fisher d. Linear models



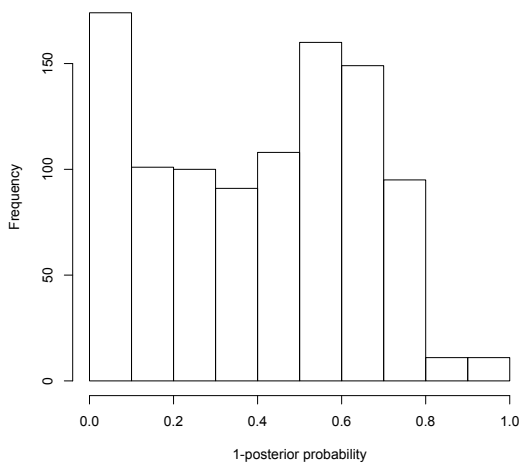

a.

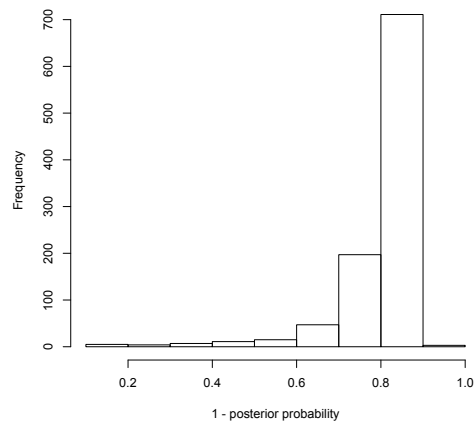

b.

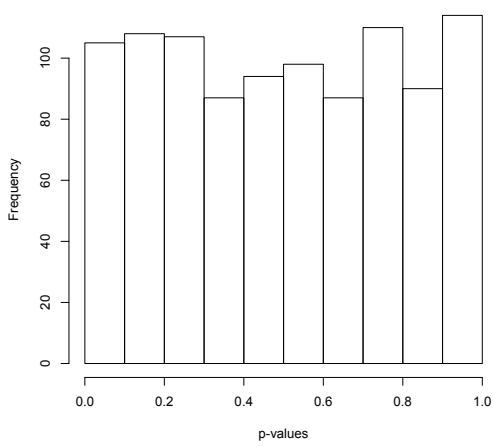

c.

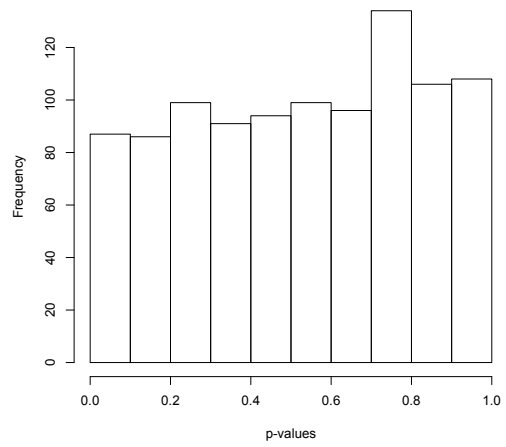

d.

Supplementary Figure 10. Sample distributions of simulated p-values and posterior probabilities from TCGA GBM data. a. Discordant. b. EBcoexpress c. Fisher d. Linear model

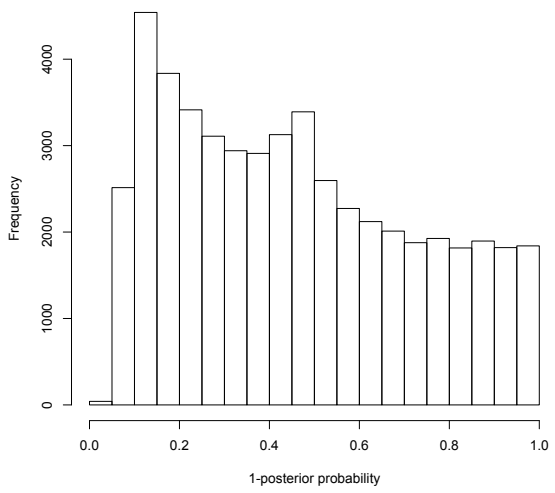

a.

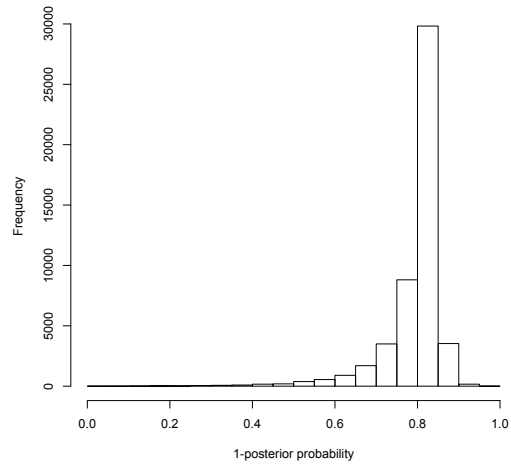

b.

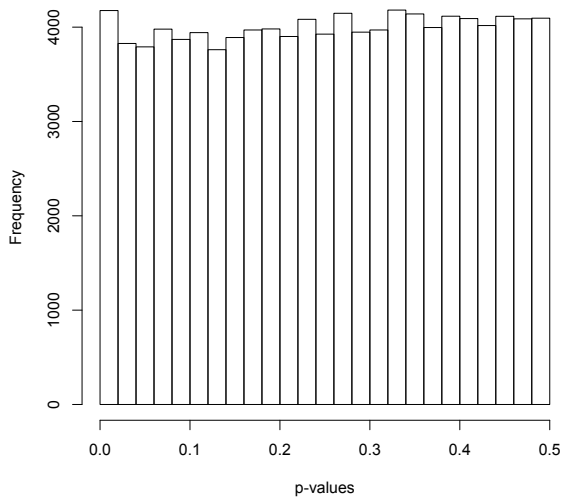

c.

Supplementary Figure 11. Sample distributions of simulated p-values and posterior probabilities from COPD data. a. Discordant. b. EBcoexpress c. Fisher
